# Supplementary figures and images for: A New Pathogenic Variant in POU3F4 Causing Deafness Due to an Incomplete Partition of the Cochlea Paved the Way for Innovative Surgery
Source: MDPI journal article supplement (doi:10.3390/genes12050613), 2021-04-21

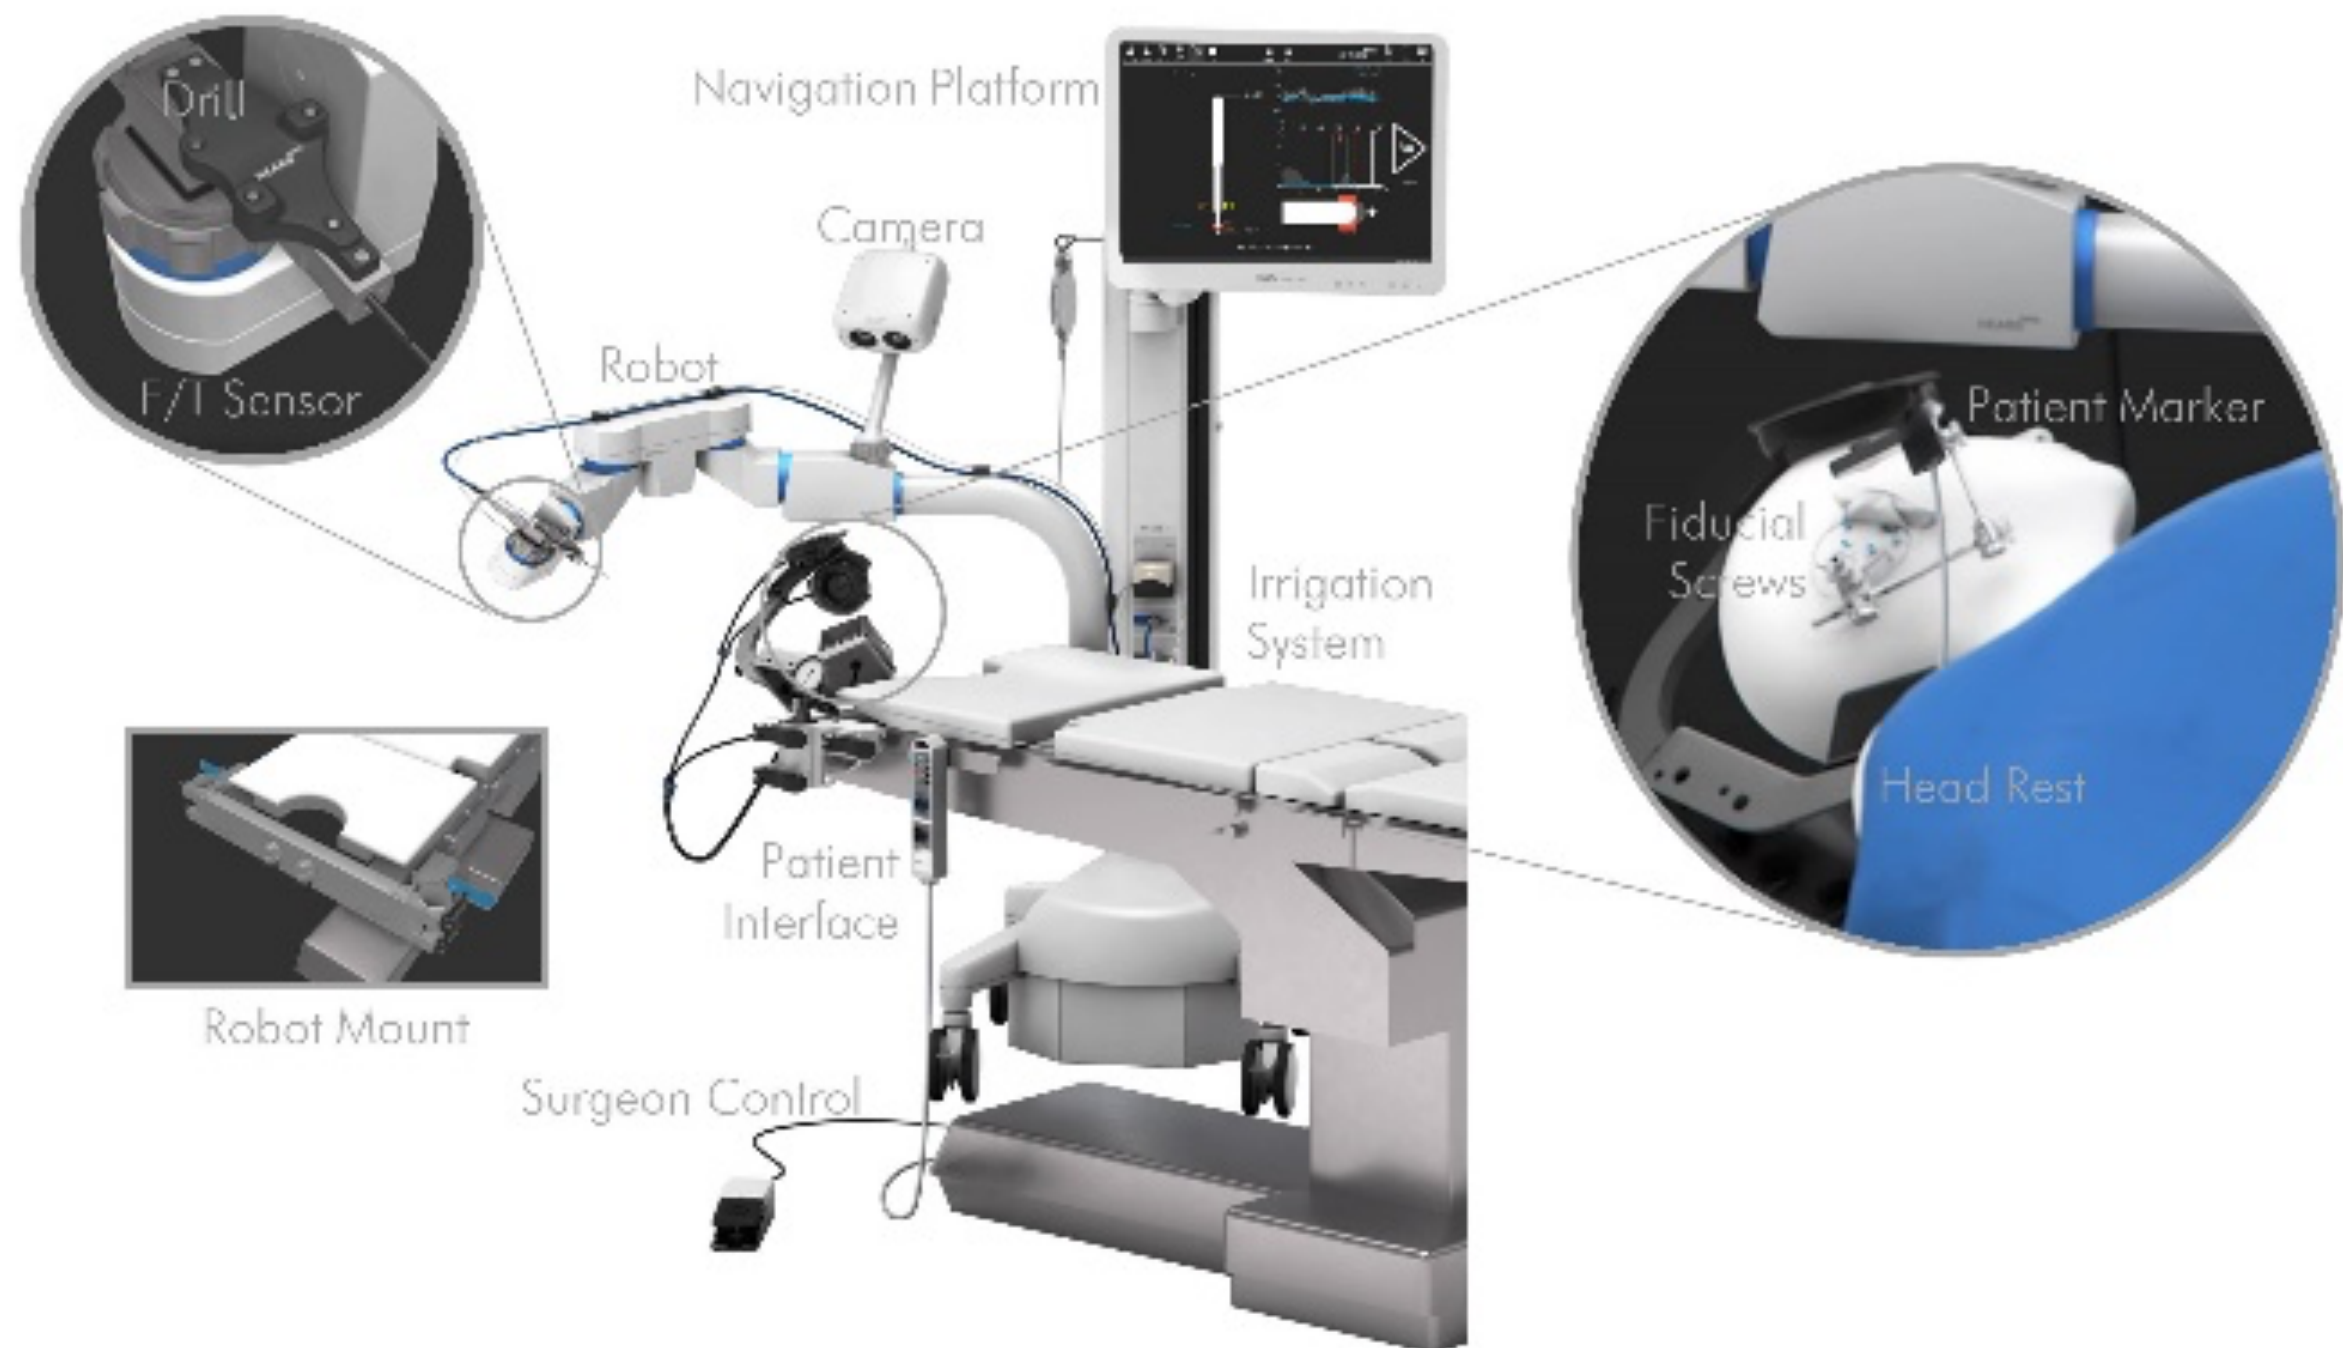

Supplement: s1 [file s1]
